# Supplementary material for: Observation of a backward sliding for rollers on surfaces in viscoelastic fluid
Source: Research Square preprint supplement (doi:10.21203/rs.3.rs-7181410/v1), 2025-09-04
Supplement: Supplementary file 1 [file 900e275cea5d0007c31a118f.pdf]

This Supplementary Information contains Supplementary Notes 1–4, Supplementary Figures 1–9 and the descriptions for Supplementary Videos 1–8.

## Table of contents

|                              |    |
|------------------------------|----|
| Supplementary Note 1 .....   | 2  |
| Supplementary Note 2 .....   | 5  |
| Supplementary Note 3 .....   | 5  |
| Supplementary Note 4 .....   | 6  |
| Supplementary Figure 1 ..... | 8  |
| Supplementary Figure 2 ..... | 9  |
| Supplementary Figure 3 ..... | 10 |
| Supplementary Figure 4 ..... | 11 |
| Supplementary Figure 5 ..... | 12 |
| Supplementary Figure 6 ..... | 12 |
| Supplementary Figure 7 ..... | 13 |
| Supplementary Figure 8 ..... | 13 |
| Supplementary Figure 9 ..... | 14 |
| Supplementary Video 1 .....  | 15 |
| Supplementary Video 2 .....  | 15 |
| Supplementary Video 3 .....  | 15 |
| Supplementary Video 4 .....  | 15 |
| Supplementary Video 5 .....  | 16 |
| Supplementary Video 6 .....  | 16 |
| Supplementary Video 7 .....  | 16 |
| Supplementary Video 8 .....  | 17 |

## Supplementary Note 1: Numerical Method

The numerical solver developed in this study comprises two subsolvers: (i) the flow solver, which solves the Navier-Stokes (N-S) equations, and (ii) the viscoelastic solver, which solves the Giesekus constitutive equation.

For fluid solver, we consider an incompressible fluid consists of a solvent and dissolved polymers. The later determines the system's non-Newtonian behavior. The non-dimensional governing equations for the flow field  $\mathbf{u}$  are as follows:

$$\begin{aligned} \nabla \cdot \mathbf{u} &= 0, \\ Re \left( \frac{\partial \mathbf{u}}{\partial t} + \mathbf{u} \cdot \nabla \mathbf{u} \right) &= -\nabla p + \nabla \cdot \mathbf{\Gamma} \end{aligned} \quad (\text{S1})$$

Here  $Re$  is the Reynolds number which is defined as  $(\omega \sigma^2)/(4\nu)$ ,  $\nu = \eta/\rho$  is the kinematic viscosity,  $\rho$  is the fluid density,  $p$  is the pressure, and  $\mathbf{\Gamma}$  is the total stress. The total viscosity  $\eta$  is defined as the sum of the solvent viscosity  $\eta_s$  and polymer viscosity  $\eta_p$ , i.e.  $\eta = \eta_s + \eta_p$ . Similarly, the total stress  $\mathbf{\Gamma}$  is defined as:

$$\mathbf{\Gamma} = \mathbf{\Gamma}_s + \mathbf{\Gamma}_p \quad (\text{S2})$$

Here  $\mathbf{\Gamma}_s$  is given by the Newtonian law  $\mathbf{\Gamma}_s = \beta_s [\nabla \mathbf{u} + (\nabla \mathbf{u})^T]$  with  $\beta_s = \eta_s/\eta$ . For a Newtonian polymer solution,  $\mathbf{\Gamma}_p = \beta_p [\nabla \mathbf{u} + (\nabla \mathbf{u})^T]$  with  $\beta_p = \eta_p/\eta$ . However, for the viscoelastic (Non-Newtonian) polymer solution considered in our work,  $\mathbf{\Gamma}_p$  needs to be calculated by solving a different constitutive equation via the viscoelastic solver described below.

For viscoelastic solver, we use the dumbbell-based model which considers a polymer chain as a spring attached to two Brownian beads. Considering the small gap and strong shear rate between the roller and wall, we use the

following Giesekus constitutive equation<sup>1</sup> to describe the polymer stress  $\mathbf{\Gamma}_p$ :

$$\mathbf{\Gamma}_p + Wi \overset{\nabla}{\mathbf{\Gamma}}_p + \frac{Wi\alpha}{\beta_p} \mathbf{\Gamma}_p \cdot \mathbf{\Gamma}_p = \beta_p (\nabla \mathbf{u} + \nabla \mathbf{u}^T) \quad (\text{S3})$$

where  $Wi$  the Weissenberg number,  $\overset{\nabla}{\mathbf{\Gamma}}_p$  denotes the Oldroyd's upper convective differentiation,  $\alpha$  the mobility parameter which accounts for non-linearity of the model.

We consider a no-slip and no-penetration boundary condition which is enforced at the roller-fluid and wall-fluid interfaces under viscous flow conditions:

$$\begin{aligned} \mathbf{u}_B &= \mathbf{0}, \\ \nabla p \cdot \mathbf{n}_B &= 0 \end{aligned} \quad (\text{S4})$$

where  $\mathbf{u}_B$  is the fluid velocity on the roller and wall surface, the subscript  $B$  denotes the roller and wall immersed surface, and  $\mathbf{n}_B$  is the normal vector to the solid surface. The governing equations S1 and S3 with boundary condition S4 are discretized and solved by using OpenFOAM based on finite volume method. To match the experimental results of the rollers reasonably, the following values for the relevant parameters are chosen:  $\alpha = 0.2$ ,  $\beta_s = 0.1$ ,  $\beta_s = 0.9$ ,  $\nu = 10^{-5} \text{ m}^2/\text{s}$ . The value of the relaxation time ( $\tau = 0.79\text{s}$ ), which determines  $Wi$ , is adopted from that measured in experiments for the  $c = 0.1 \text{ g/L}$  PAAM solution.

Supplementary Fig. 5a presents the numerical model setup for the sliding motion of a rotating sphere. The fluid zone reaches  $60\sigma$  away from the sphere center in every direction except to the boundary wall below, this allows us to ignore any irrelevant boundary effect. The sphere boundary condition is set for a constant angular velocity. When modeling the sliding motion, we set a uniform sliding velocity for the whole fluid zone (including the boundary wall).

Supplementary Fig. 5b presents the computational mesh, which is composed of unstructured tetrahedral elements. Far from the roller, the mesh element size is about  $10\sigma$ . Near the roller (here a semisphere region with radius  $1.5\sigma$  above the boundary wall and centered at the point on the boundary which is closest to the roller), the mesh element size is about  $\sigma/40$ , which is much smaller than that far from the roller.

To validate our numerical methods, we perform two validation cases and compare our results with those in literature. We first consider the creeping flow around a rotating sphere close to a wall in Newtonian fluid, which has been studied theoretically by.<sup>2</sup> Supplementary Fig. 6 shows our numerically calculated force  $F$  in the horizontal direction (parallel to the wall) and the calculated torque  $M$  whose direction is aligned with the angular velocity, which are in good agreement with the previous theoretical results. The definition of  $F$  and  $M$  is given by:

$$\begin{aligned} F &= \int_{\partial P_0} (-p\mathbf{I} \cdot \mathbf{n} + \mathbf{\Gamma} \cdot \mathbf{n}) \, dS \\ M &= \int_{\partial P_0} (\mathbf{\Gamma} \times \mathbf{n}) \, dS \end{aligned} \tag{S5}$$

Here  $\mathbf{I}$  is the unit tensor,  $\mathbf{\Gamma}$  is the viscous stress acting on the sphere surface,  $S$  the sphere surface,  $\mathbf{n}$  the unit vector along surface normal,  $\partial P_0$  the unit area of the surface. In the second validation case, we have calculated the shear flow induced sphere rotation speed in viscoelastic fluid which was numerically studied by.<sup>3</sup> Again, our results are in good agreement with the those in literature as shown in Supplementary Fig. 7.

## Supplementary Note 2: A comparison between the Giesekus model and the Oldroyd-B model

When we choose  $\alpha = 0$  in our Eq. S3, our model reduces to the classic Oldroyd-B model. In Supplementary Fig. 8 we compare the flow field obtained via the Giesekus model and that obtained via the Oldroyd-B model for a roller rotating with  $\omega = 1.27$  rad/s and translating with  $v = -0.044$   $\mu\text{m/s}$  at a fixed distance  $h = 1.15r$  away from the surface. We see that, for both models the streamline exhibits a helical ascent in the y-direction, indicating the occurrence of the rod-climbing effect. This suggest that both models capture the essence of the shear-flow-induced polymer stretch, which explains the backward sliding in our experiments.

## Supplementary Note 3: Quantitative analysis of the polymer stretch.

We use the polymer conformation tensor  $\mathbf{A} = \langle \mathbf{q}\mathbf{q} \rangle_{\text{polymer configuration}}$  to describe the intensity of polymer stretch. Here  $\mathbf{q}$  is the end-to-end vector of the polymer chain and the angle brackets represent the average over polymer chain configurations. For a polymer in its natural configuration, its end-to-end vector  $\mathbf{q}$  has unit length which gives  $\text{tr}(\mathbf{A}) = 3$ . Correspondingly, for a stretched polymer  $\text{tr}(\mathbf{A}) > 3$  and for a compressed polymer  $\text{tr}(\mathbf{A}) < 3$ . In our model,  $\mathbf{A}$  is calculated from the polymer stress tensor  $\mathbf{\Gamma}_p$  via the relation  $\mathbf{\Gamma}_p = (\tau/\beta_p)(\mathbf{A} - \mathbf{I})$ , where  $\tau$  the relaxation time and  $\mathbf{I}$  the unit tensor. The axial ratio of the ellipsoid in Fig. 2a of the main text is then defined as  $\text{tr}(\mathbf{A})/3$ , so that a polymer in its natural configuration (i.e. without stretching or compressing) will be represented by a sphere.

## Supplementary Note 4: Force analysis for a rotating and translating sphere near a wall.

In ref.,<sup>7</sup> the motion of a rotating sphere near a wall in Newtonian fluid at low Reynolds number is approximated as a decomposition of a pure rotation and pure translation. Here we show that the same can be done for the rolling motion of a sphere in viscoelastic fluid. To do this, we calculate the parallel component (i.e. parallel to the surface) of the following four forces with our Giesekus model for a pure rotation sphere or a pure translation sphere at a distance  $h = 1.15r$  from the surface. Firstly, we calculate the elastic force for a pure rotation sphere, which can be understood as  $T_{\parallel}$  in Eq. (1) of the main text. Secondly, the sum of the viscous force and pressure force for a pure rotation sphere, which can be understood as  $f$  in Eq. (1) of the main text. Thirdly, the total force for a pure translation sphere, which can be understood as  $\gamma v$  in Eq. (1) of the main text. Fourthly, the net force  $F_{\text{net}} = f - T_{\parallel} - \gamma v$ . The elastic force  $T_{\parallel}$  is given as follows:

$$T_{\parallel} = \left( \int_{\partial P_0} (\mathbf{\Gamma}_e \cdot \mathbf{n}) \, dS \right)_{\text{rotation}} \quad (\text{S6})$$

Here  $\mathbf{\Gamma}_e = \mathbf{\Gamma}_p - \beta_p(\nabla \mathbf{u} + \nabla \mathbf{u}^T)$  is the elastic stress acting on the sphere surface,  $\mathbf{\Gamma}_p$  is the viscoelastic stress acting on the sphere surface,  $S$  the sphere surface,  $\mathbf{n}$  the unit vector along surface normal,  $\partial P_0$  the unit area of the surface. Similarly,  $f$  is given as:

$$f = \left( \int_{\partial P_0} (-p\mathbf{I} \cdot \mathbf{n} + \mathbf{\Gamma}_v \cdot \mathbf{n}) \, dS \right)_{\text{rotation}} \quad (\text{S7})$$

$\gamma v$  is given as:

$$\gamma v = \left( \int_{\partial P_0} (-p \mathbf{I} \cdot \mathbf{n} + \mathbf{\Gamma}_v \cdot \mathbf{n} + \mathbf{\Gamma}_e \cdot \mathbf{n}) \, dS \right)_{\text{translation}} \quad (\text{S8})$$

Here  $\mathbf{\Gamma}_v = (\beta_p + \beta_s)(\nabla \mathbf{u} + \nabla \mathbf{u}^T)$  is the viscous stress acting on the sphere surface. Supplementary Fig. 9 presents the numerically calculated  $T_{\parallel}$ ,  $f$ ,  $\gamma v$  and  $F_{\text{net}}$  as a function of  $Wi$ . Clearly, at small  $Wi$ ,  $T_{\parallel}$  is smaller than  $f$ . This suggests a forward motion which corresponds to  $\gamma v < 0$ . When  $Wi$  becomes greater than a critical value  $Wi_c$ ,  $T_{\parallel}$  becomes larger than  $f$ . This suggests backward motion which corresponds to  $\gamma v > 0$ . Remarkably,  $F_{\text{net}}$  is almost zero for all  $Wi$  considered here. This validates the motion decomposition strategy mentioned above and also validates Eq. (1) of the main text. Note that  $f$  becomes smaller as  $Wi$  increases. This is a sign of shear thinning which is expected for the Giesekus model. Even though such shear thinning effect facilitates the backward motion, the major driving force for the backward motion in our experiments is  $T_{\parallel}$  which is clearly revealed in Fig. 2c of the main text and in Supplementary Video 6.

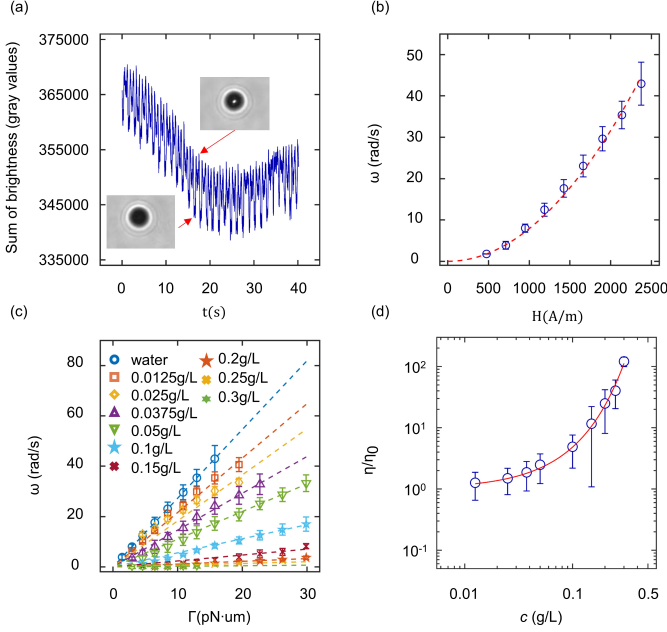

**Supplementary Fig. 1 Colloid rotation determination, magnetic torque calibration and polymer viscosity measurement.** A rotating magnetic field  $\mathbf{H}(t)$  in the  $xz$  plane was generated with  $H_x(t) = H \cos(\omega_H t)$  and  $H_z(t) = H \sin(\omega_H t)$ . The field frequency was fixed at  $\omega_H = 20\pi \text{ s}^{-1}$ . Janus superparamagnetic colloidal spheres ( $\sigma = 4.5 \mu\text{m}$ ) were prepared as described in the *Methods* section of the main text and were dispersed in water. **a**, The experimentally measured light intensity variation within a  $50 \times 50 \text{ pixel}^2$  (or  $7.4 \times 7.4 \mu\text{m}^2$ ) area under the microscope where a Janus superparamagnetic colloidal sphere is rolling. With a Fourier analysis we determined the rotation period of the roller to be 1.36 second. This corresponds to a rolling angular velocity of  $\omega = 4.64 \text{ rad/s}$ . A magnetic field of  $H = 711.4 \text{ A/m}$  was applied to achieve the rolling here. **b**, The measured angular velocity  $\omega$  of the Janus colloidal sphere rollers in water as a function of the applied magnetic field strength  $H$ . Experimental data are shown as circles, and the solid line is a fit to the relation  $\omega = k_m H^2$ , yielding  $k_m = (7.90 \pm 0.3) \times 10^{-6} \text{ m}^2/(\text{A}^2 \cdot \text{s})$ . Considering the viscosity of water  $\eta_0 = 0.0013 \pm 0.0002 \text{ Pa}\cdot\text{s}$ , this gives  $\gamma_m = \pi\eta_0\sigma^3 k_m = 2.94 \times 10^{-6} \text{ pN} \cdot \mu\text{m} \cdot \text{A}^{-2} \cdot \text{m}^2$ . Thus we have calibrated the magnetic torque applied to the sphere  $\Gamma = \gamma_m H^2$ . **c**, The experimentally measured  $\omega$ - $\Gamma$  relation for magnetic particles in PAAM solutions of varying concentrations. Dashed lines are the linear fittings to  $\omega = \Gamma/(\pi\eta\sigma^3)$  which gives the effective viscosity  $\eta$  of the PAAM solutions. **d**, The measured  $\eta$  as a function of  $c$  for PAAM solutions at  $c < 0.3 \text{ g/L}$ . The results fit (solid line) nicely to an exponential function  $\eta/\eta_0 = \exp(\beta c)$ , with fitted  $\beta = 15.8 \text{ L/g}$ .



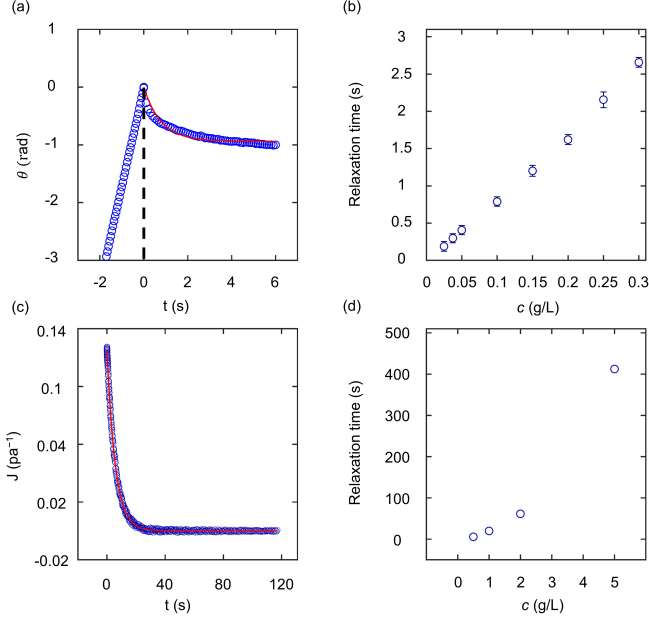

**Supplementary Fig. 2 Relaxation time measurement for PAAM solution.**

Detailed description of the measurement is found in the *Methods* section of the main text. **a**, Data points (blue circles) are the angular displacement  $\theta$  of a colloidal trimmer as a function of time. The trimmer is rotating in a 0.1 g/L PAAM solution with fixed angular velocity at  $t < 0$  and the magnetic torque is suddenly removed at  $t = 0$ . The  $t > 0$  part shows the angular relaxation of the colloid trimmer, from which we determine the relaxation time  $\tau$  of the PAAM solution via fitting (the red solid line) to an exponential function  $\theta(t) = a(e^{-t/\tau} - 1)$ , with fitted  $a = 0.94$  rad and  $\tau = 0.78$  s here. This method is used for all the dilute and semidilute PAAM solution and the measured  $\tau$  is not sensitive to the initial angular velocity of the trimmer. **b**, The measured relaxation time  $\tau$  as a function of polymer concentration  $c$  in the dilute and semidilute regime. **c**, The data points (blue circles) shows the relaxation of the compliance  $J$  when the applied stress is removed at  $t = 0$  in the creep-recovery experiments (via a rotational rheometer).<sup>5</sup> The relaxation time  $\tau$  of the PAAM solution is determined by fitting (red solid line) the data points to  $J(t) = J_0(e^{-t/\tau})$ , with  $J_0 = 0.13$  Pa<sup>-1</sup> and fitted  $\tau = 5.7$  s for a 0.5 g/L PAAM solution here. **d**, The measured relaxation time as a function of polymer concentration  $c$  in the high-concentration regime.

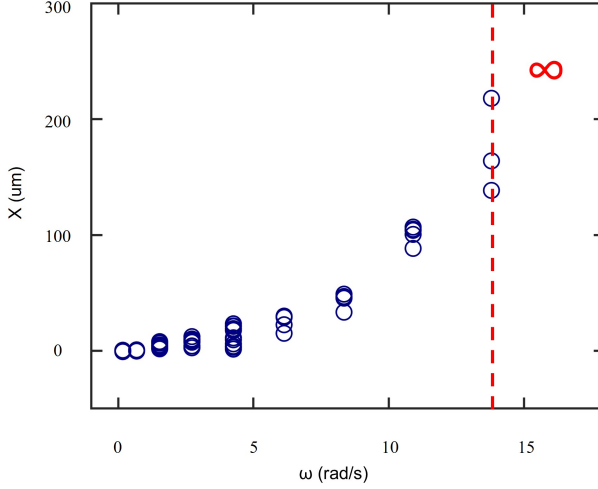

**Supplementary Fig. 3 Evidence of rolling-induced roller-to-surface attraction.**

Due to the effective attraction between the roller and the surface, the roller can roll at the ceiling for a certain distance before it drops to the ground under gravitational pulling. The figure here shows the measured displacement  $X$  on the ceiling as a function of the rotation speed  $\omega$  of a  $\sigma = 4.5 \mu\text{m}$  roller in a  $c = 0.05 \text{ g/L}$  PAAM fluid. Clearly,  $X$  rapidly increases with  $\omega$ , indicating a stronger roller-to-surface attraction at large  $\omega$ . In addition, when  $\omega > 15 \text{ rad/s}$ , the attraction between the roller and the surface become so strong that the roller no longer drop to the ground in our experiments. Note that the polymer in the viscoelastic fluid can induce a depletion attraction  $U_{\text{depletion}}$  between the roller and the ceiling. We estimate its value via the Asakura-Oosawa theory.<sup>6</sup> Consider the polymer (PAAM) radius of gyration  $R_g = 0.0158M_w^{0.58} \text{ nm}$ ,<sup>7</sup> number density  $n = N_A c/M_w$ , and the distance between the sphere surface and the wall  $z < 2R_g$ . This gives  $U_{\text{depletion}} = -2\pi R_g^2 \sigma n k_B T$  at  $z = 0$ . In our experiment, the molecular weight  $M_w = 18 \text{ MDa}$ . This gives  $U_{\text{depletion}} = -3.08 k_B T$  for  $c = 0.05 \text{ g/L}$ . This depletion attraction strength is not sufficient to hold the roller to the ceiling for a prolonged period of time, considering the buoyant weight  $286 \text{ fN}$  of the  $\sigma = 4.5 \mu\text{m}$  roller. This is confirmed in our experiments where the roller falls quickly from the ceiling when the  $\omega$  of the roller is small.

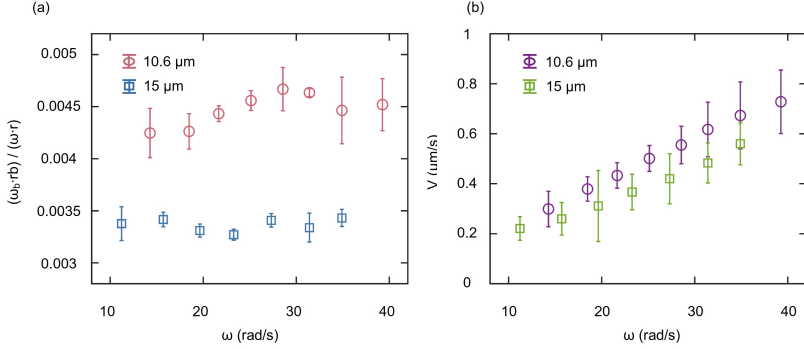

**Supplementary Fig. 4 Motion transmission from magnetic sphere to non-magnetic sphere.** The counterclockwise velocity of the superparamagnetic colloidal spheres and the  $\text{SiO}_2$  sphere (diameters of 10.6  $\mu\text{m}$  and 15  $\mu\text{m}$  respectively) as a whole at different angular velocities of the superparamagnetic colloidal sphere in the 0.1 g/L PAAM solution. **a**, The experimentally measured motion transmission ratio  $\omega_b r_b / \omega r$  as a function of  $\omega$ . Here  $\omega_b$  and  $r_b$  the angular velocity and radius of the non-magnetic sphere respectively,  $\omega$  and  $r$  the angular velocity and radius of the magnetic sphere. The results indicate that the motion transmission ratio is not sensitive to the angular velocity  $\omega$  of the magnetic sphere in the range of  $\omega$  considered. **b**, The orbital speed  $V$  of the non-magnetic spheres as a function of  $\omega$  for the circular motion of the non-magnetic sphere as described in Fig. 4b of the main text.  $V$  increases almost linearly with  $\omega$ .

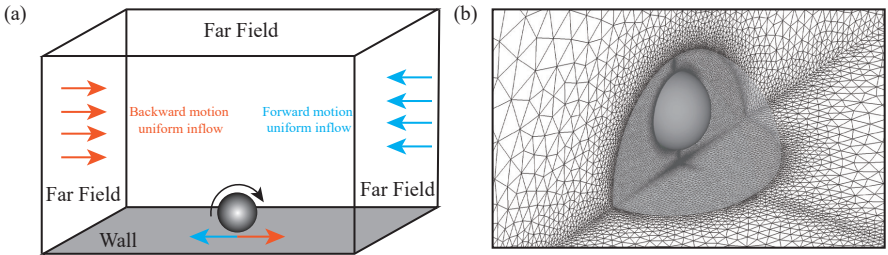

**Supplementary Fig. 5 Numerical setup and mesh setup around roller.** (a) The numerical setup. The fluid zone is inside a square box of  $120\sigma \times 120\sigma$  base area and  $60\sigma$  by height. The sphere sits above the center of the base with a fixed sphere-to-wall gap distance  $h$ . (b) The mesh setup. The computational mesh is composed of unstructured tetrahedral elements. Far from the roller, the mesh element size is about  $10\sigma$ . Near the roller (here a hemisphere region with radius  $1.5\sigma$  above the boundary wall and centered at the point on the boundary which is closest to the roller), the mesh element size is about  $\sigma/40$ .

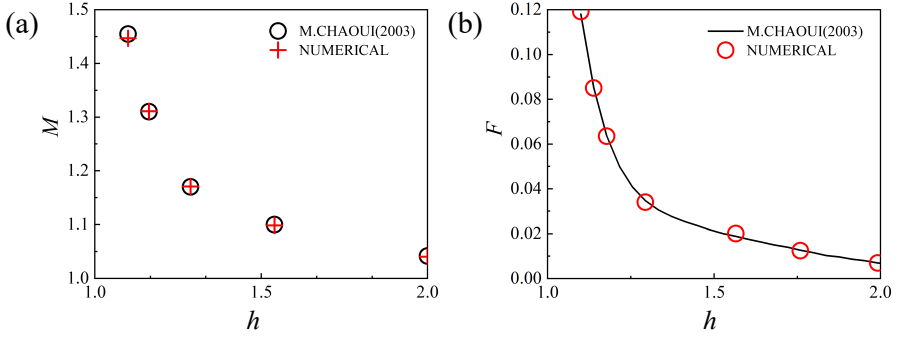

**Supplementary Fig. 6** Validation case 1: Creeping flow around a rotating sphere close to a wall (rotating axis is parallel to the wall). (a) The numerically calculated torque as a function of  $h$ . (b) The numerically calculated force  $F$  experienced by the sphere in the direction parallel to the wall as a function of  $h$ . We set the Reynold number to be  $Re = 0.01$  and compare our results with the data in.<sup>2</sup>

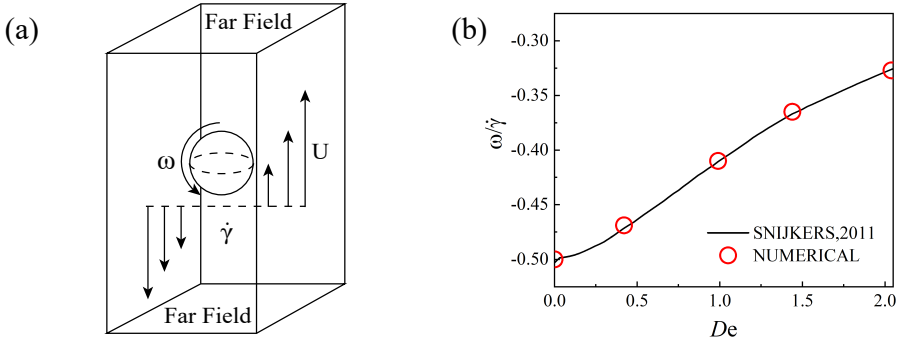

**Supplementary Fig. 7** Validation case 2: Shear flow induced rotation for a sphere in Non-Newtonian fluid. (a) Schematic diagram of the case,  $\omega$  is the angular velocity of the sphere at steady state,  $\dot{\gamma}$  is the shear rate,  $U$  is the boundary flow velocity. (b) Our numerically calculated  $\omega/\dot{\gamma}$  as a function of the Deborah number  $De = \tau\dot{\gamma}$ , in comparison with the data in.<sup>3</sup> We have set  $Re = 0.01$  and therefore ignored the inertial effect.

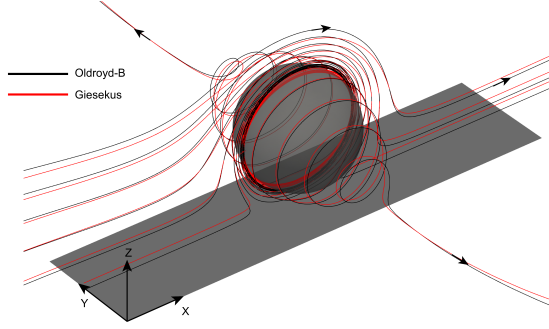

**Supplementary Fig. 8** A comparison of the flow field calculated with the Oldroyd-B model and the Giesekus model.

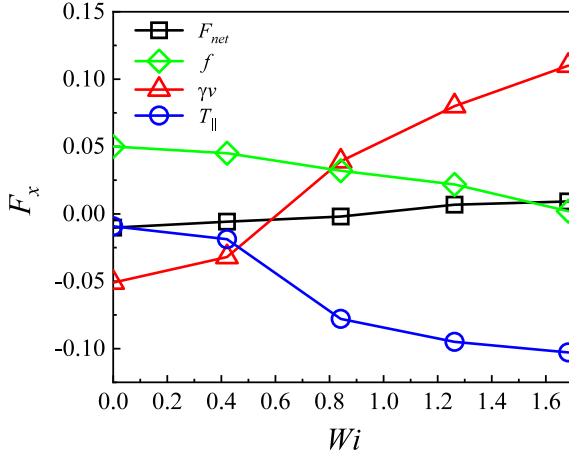

**Supplementary Fig. 9** Data points are the numerically calculated force  $T_{\parallel}$ ,  $f$ ,  $\gamma v$  and  $F_{net}$  at different  $Wi$  as mentioned in Supplementary Note 4. Here  $\omega = 1.27$  rad/s,  $Wi$  is adjusted by changing relaxation time  $\tau$ . Lines are guides for the eye.

**Supplementary Video 1:** The motion of rollers in two different viscous fluids and in three different viscoelastic fluids as indicated in the movie. The  $\sigma = 4.5 \mu\text{m}$  roller is used here except in the case of the egg white liquid where a cylindrical magnet with diameter 2 mm and length of 5 mm is used. The rotating axis of all rollers point to the same direction (i.e. the positive  $y$  direction as shown in Fig. 1a of the main text), with the given angular velocity  $\omega$  as indicated in the movie. All rollers in viscoelastic fluid move from right to left (i.e. backward sliding) while those in viscous fluid move from left to right.

**Supplementary Video 2:** The motion of different sized and shaped rollers on flat as well as on rough surfaces in the PAAM solution (viscoelastic fluid). The size and shape of the rollers, their angular velocity  $\omega$  and the PAAM concentration are indicated in the movie. All rollers reveal backward sliding.

**Supplementary Video 3:** The motion of a  $\sigma = 4.5 \mu\text{m}$  colloidal particle and a colloidal trimer roll in a  $0.025 \text{ g/L}$  PAAM solution with  $k = 0$ . The angular velocity of the rollers are indicated in the movie.

**Supplementary Video 4:** The flow field around a rolling  $\sigma = 30 \mu\text{m}$  magnetic colloidal particle in a  $0.1 \text{ g/L}$  PAAM solution, revealed via small tracer particles ( $\sigma = 1 \mu\text{m}$  polystyrene beads). The angular velocity of the roller is  $\omega = 1.27 \text{ rad/s}$ . Note that the small tracer particles have nonzero migration towards both positive and negative  $y$ -axis. This agrees with the numerically calculated flow field in Fig. 2a of the main text.

**Supplementary Video 5:** The backward sliding of a micrometer roller ( $\sigma = 4.5 \mu\text{m}$ ) and a millimeter roller ( $\sigma = 2 \text{ mm}$ ) towards cliffs in viscoelastic fluids. Both rollers does not roll off the cliff (i.e. their translational motion ceases when they arrive at the cliff), even though they are continuously rotating. For the millimeter roller, the cliff is constructed with a stack of 4 glass slides of about 1.2 mm thick. For the micrometer roller, the cliff is the side wall of a  $15 \mu\text{m}$  deep square pit. The profile of a cross section (in  $x$ - $z$  plane) of the square pit is shown, which is measured using a surface profilometer (Alpha-step D-600, KLA Corporation, USA).

**Supplementary Video 6:** Experimental evidence of roller-wall attraction. (top) The rolling of  $\sigma = 4.5 \mu\text{m}$  magnetic particles at the ceiling of a sample cell, where the microscope objective is focused on. At the beginning of the video, a colloidal sphere at the left side is rolling on the ceiling (i.e. in focal plane) towards right. At a later time it falls (i.e. gets out of focus) towards the bottom surface of the sample cell and starts to roll towards left. (bottom) The rolling of  $\sigma = 4.5 \mu\text{m}$  colloidal particles and trimmers along the side wall of a  $15\mu\text{m}$  deep square pit with  $80\mu\text{m} \times 80\mu\text{m}$  size. The applied magnetic field  $H_x = H \cos \omega_H t$ ,  $H_y = -H \sin \omega_H t$ ,  $H_z = 0$  with  $H = 1257.2 \text{ A/m}$  and  $\omega_H = 200\pi \text{ s}^{-1}$  so that the colloid rotate along the  $z$  axis (i.e. perpendicular to the field of view) as indicated in Fig. 1a of the main text.

**Supplementary Video 7:** The circular motion of non-magnetic particles induced by the rotation of the attached small magnetic particles in 0.1 g/L PAAM solution. The magnetic particles rotate along the  $z$  axis with their angular velocities indicated in the movie.

**Supplementary Video 8:** Demonstration of cargo delivery towards the target location via the protocols defined in Fig. 4c of the main text.

## References

- [1] Giesekus, H. A simple constitutive equation for polymer fluids based on the concept of deformation-dependent tensorial mobility. *J. Non-Newtonian Fluid Mech.* **11**, 69–109 (1982).
- [2] Chaoui, M. & Feuillebois, F. Creeping flow around a sphere in a shear flow close to a wall. *Q. J. Mech. Appl. Math.* **56**, 381–410 (2003).
- [3] Goyal, N. & Derksen, J. J. Direct simulations of spherical particles sedimenting in viscoelastic fluids. *J. Non-Newtonian Fluid Mech.* **183**, 1–13 (2012).
- [4] Goldman, A. J., Cox, R. G. & Brenner, H. Slow viscous motion of a sphere parallel to a plane wall—I: Motion through a quiescent fluid. *Chem. Eng. Sci.* **22**, 637–651 (1967).
- [5] Koser, A. E. et al. Measuring material relaxation and creep recovery in a microfluidic device. *Lab Chip* **13**, 1850–1853 (2013).
- [6] Asakura, S. & Oosawa, F. On interaction between two bodies immersed in a solution of macromolecules. *J. Chem. Phys.* **22**, 1255–1256 (1954).
- [7] Kubota, K. et al. Characterization of poly(N-isopropylmethacrylamide) in water. *Polym. J.* **22**, 1051–1057 (1990).
